# Supplementary material
Source: Springer Nature journal article supplement (https://www.springermedizin.de/resource/supplementary/12916_2009_214_MOESM7_ESM.pdf/9599408)

**Id, Sex, Study name**

**Relative Risk  
95% CI**

**Relative Risk  
95% CI**

**USA**  
**2 M Vincent and Marchetta 1963**

**1.81 (0.33, 9.97)**

**3 M Williams and Horm 1977**

**2.01 (1.15, 3.51)**

**6 M Wynder and Stellman 1977**

**1.40 (1.04, 1.89)**

**12 M+F Stockwell and Lyman 1986**

**2.02 (0.84, 4.86)**

**Subtotal (95% CI)**

**1.56 (1.21, 2.00)**

**SCANDINAVIA**

**16 M Lewin et al 1998**

**0.90 (0.50, 1.50)**

**Subtotal (95% CI)**

**0.90 (0.52, 1.56)**

**Total (95% CI)**

**1.43 (1.08, 1.89)**

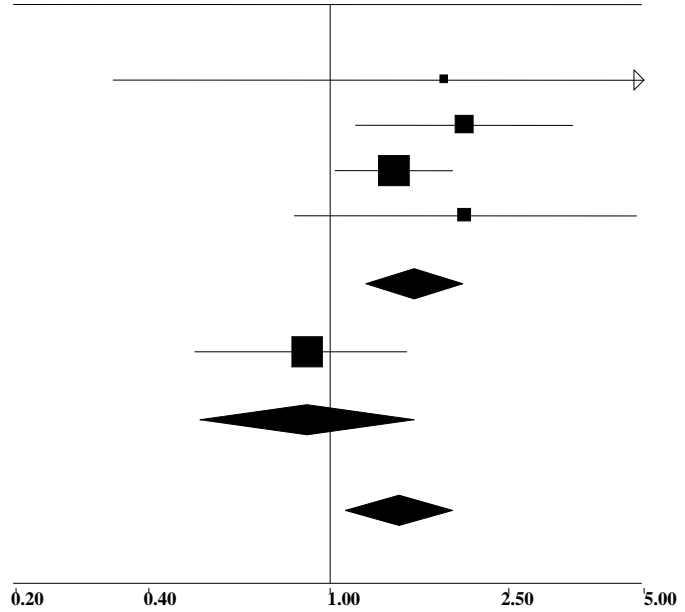

Supplement: MOESM7 [file 9599408]
